# Supplementary material
Source: PubMed Central journal article supplement (PMC8097444)
Supplement: AAC.02577-20-s0001.pdf [file AAC.02577-20-s0001.pdf]

## SUPPLEMENTARY INFORMATION

**Table S1: Chemical structures of the effective drug against SARS-CoV-2 3CL<sup>pro</sup>**

**screened out of 1068 drugs.**

| Drug      | Structure                                                                                                                                                                                                                                                                                                                                                                                                                         |
|-----------|-----------------------------------------------------------------------------------------------------------------------------------------------------------------------------------------------------------------------------------------------------------------------------------------------------------------------------------------------------------------------------------------------------------------------------------|
| Tolcapone | 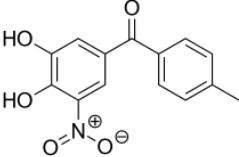 <p>The chemical structure of Tolcapone is shown. It consists of a central benzene ring with two hydroxyl groups (HO) at the 3 and 4 positions and a nitro group (NO<sub>2</sub>) at the 1 position. This ring is connected via a carbonyl group (C=O) to another benzene ring, which has a methyl group (CH<sub>3</sub>) at the 4 position.</p> |

**Table S2: Chemical structures of the additional 11 effective drugs against SARS-**

**CoV-2 3CL<sup>pro</sup> screened from 2701 drugs.**

| Drug                                                                                                          | Structure                                                                            |
|---------------------------------------------------------------------------------------------------------------|--------------------------------------------------------------------------------------|
| Benserazide HCl (aromatic L-amino acid decarboxylase or DOPA decarboxylase inhibitor)                         | 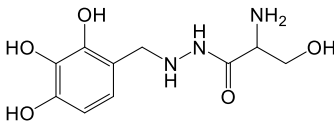   |
| Boceprevir (HCV protease inhibitor, published 3CL <sup>pro</sup> inhibitor)                                   |    |
| Cefazolin (antibiotic)                                                                                        |   |
| Delavirdine (non-nucleoside reverse transcriptase inhibitor)                                                  |  |
| Disulfiram (acetaldehyde dehydrogenase inhibitor for anti-alcoholism, published 3CL <sup>pro</sup> inhibitor) |   |
| Ebselen (scavenger of hydroperoxides, published 3CL <sup>pro</sup> inhibitor)                                 |   |
| Levothyroxine (thyroid hormone)                                                                               |  |

|                                                                                          |                                                                                                                                                                                                                                                                                                                                                                                                                                              |
|------------------------------------------------------------------------------------------|----------------------------------------------------------------------------------------------------------------------------------------------------------------------------------------------------------------------------------------------------------------------------------------------------------------------------------------------------------------------------------------------------------------------------------------------|
| <p>Manidipine 2HCl (calcium channel blocker used clinically as an anti-hypertensive)</p> | 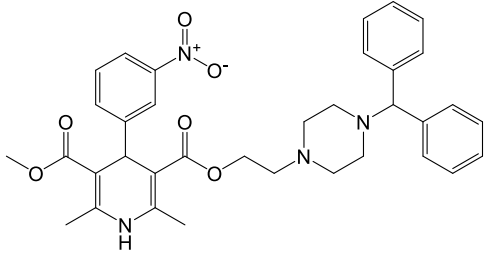 <p>The structure shows a central 1,4-dihydropyridine ring with methyl groups at the 2 and 6 positions. At the 4-position, there is a nitro group (-NO<sub>2</sub>) and a methoxycarbonyl group (-COOCH<sub>3</sub>). At the 3-position, there is a propyl chain ending in a piperazine ring, which is further substituted with two phenyl groups.</p>     |
| <p>Methimazole (treats overactive thyroid)</p>                                           |  <p>The structure is a five-membered imidazole ring with a sulfur atom at the 2-position and a methyl group (-CH<sub>3</sub>) attached to the nitrogen at the 1-position.</p>                                                                                                                                                                               |
| <p>Propafenone HCl (class 1C anti-arrhythmic medication)</p>                             |  <p>The structure features a benzofuran core. At the 3-position of the benzene ring, there is a propyl chain ending in a phenyl group. At the 4-position of the furan ring, there is a propyl chain ending in a secondary amine group (-NH-CH<sub>2</sub>-CH<sub>2</sub>-CH<sub>3</sub>), which also has a hydroxyl group (-OH) on the adjacent carbon.</p> |
| <p>Retigabine 2HCl (anticonvulsant)</p>                                                  |  <p>The structure consists of a central benzene ring with an amino group (-NH<sub>2</sub>) at the 1-position and an ethyl carbamate group (-NH-CO-O-CH<sub>2</sub>-CH<sub>3</sub>) at the 2-position. A benzyl group (-CH<sub>2</sub>-C<sub>6</sub>H<sub>5</sub>) is attached to the nitrogen at the 4-position.</p>                                      |

**Table S3: Chemical structures of the 10 effective drugs against SARS-CoV-2**

PL<sup>pro</sup> screened out of 1068 drugs

| Drug                                                                                                        | Structure                                                                            |
|-------------------------------------------------------------------------------------------------------------|--------------------------------------------------------------------------------------|
| Capastat sulfate (polypeptide antibiotic)                                                                   | 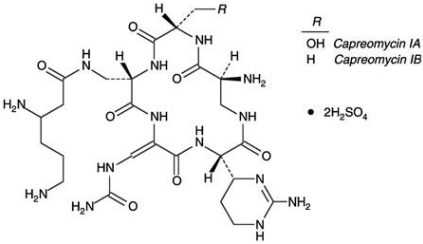   |
| Ceritinib [anaplastic lymphoma kinase (ALK)-positive inhibitor for the treatment of metastatic lung cancer] |    |
| Clonidine HCl (treats high blood pressure)                                                                  |    |
| Cobimetinib (MEK inhibitor to treat skin cancer)                                                            |  |
| Gentamycin sulfate (aminoglycoside antibiotic)                                                              |  |
| <b>Maprotiline HCl (anti-depressant)</b>                                                                    |   |
| Netilmicin sulfate (aminoglycoside antibiotic)                                                              |  |

|                                                                                                                                                 |                                                                                                                                                                                                                                                                                                                                                                                                                                                                                                      |
|-------------------------------------------------------------------------------------------------------------------------------------------------|------------------------------------------------------------------------------------------------------------------------------------------------------------------------------------------------------------------------------------------------------------------------------------------------------------------------------------------------------------------------------------------------------------------------------------------------------------------------------------------------------|
| <p>Reserpine (blocks the H<sup>+</sup>-coupled vesicular monoamine transporters, VMAT1 and VMAT2, for the treatment of high blood pressure)</p> | 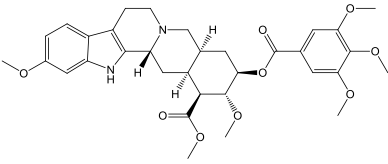 <p>The chemical structure of Reserpine is a complex pentacyclic alkaloid. It features a central indole ring system fused to a piperidine ring, which is further fused to a hexahydroindole ring. A decalin-like ring system is attached to the piperidine ring. The structure is highly substituted with several methoxy groups and a complex side chain containing a tertiary amine and a carboxylate group.</p> |
| <p>Primaquine diphosphate (anti-malarial)</p>                                                                                                   |  <p>The chemical structure of Primaquine shows a quinoline ring system. The quinoline ring is substituted with a methoxy group at the 8-position and a 4-amino-2-methylbutylamino group at the 6-position.</p>                                                                                                                                                                                                     |
| <p>Venlafaxine HCl (serotonin and norepinephrine reuptake inhibitor used as antidepressant)</p>                                                 |  <p>The chemical structure of Venlafaxine is a cyclohexane ring in a chair conformation. It has a hydroxyl group at the 1-position and a 2-(4-methoxyphenyl)ethyl-N,N-dimethylamino group at the 2-position.</p>                                                                                                                                                                                                    |

**Table S4: Chemical structures of the additional 26 effective drugs against SARS-**

**CoV-2 PL<sup>pro</sup> screened from 2701 drugs**

| Drug                                                             | Structure                                                                            |
|------------------------------------------------------------------|--------------------------------------------------------------------------------------|
| Amifostine (cytoprotective adjuvant used in cancer chemotherapy) | 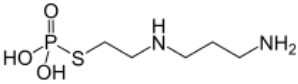    |
| Amikacin hydrate (aminoglycoside antibiotic)                     |    |
| Apramycin sulfate (aminoglycoside antibiotic)                    |   |
| Berberine 2HCl (calcium channel blocker)                         |   |
| Canrenone (steroidal anti-mineralocorticoid)                     |   |
| Capreomycin sulfate (polypeptide antibiotic)                     |  |

|                                                                               |                                                                                     |
|-------------------------------------------------------------------------------|-------------------------------------------------------------------------------------|
| <p>Caspofungin acetate<br/>(lipopeptide anti-fungal drug)</p>                 | 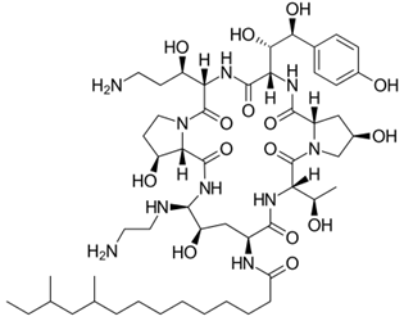  |
| <p>Desmopressin acetate<br/>(controls the amount of urine made by kidney)</p> |   |
| <p>Dihydrostreptomycin sulfate<br/>(aminoglycoside antibiotic)</p>            |   |
| <p>Erythromycin thiocyanate<br/>(aminoglycoside antibiotic)</p>               |  |
| <p>Fangchinoline (anti-cancer)</p>                                            |  |
| <p>Guanethidine sulfate (anti-hypertensive drug)</p>                          |  |

|                                                                                          |                                                                                                                                                                                                                                                                                                                                                                                                                                                                                     |
|------------------------------------------------------------------------------------------|-------------------------------------------------------------------------------------------------------------------------------------------------------------------------------------------------------------------------------------------------------------------------------------------------------------------------------------------------------------------------------------------------------------------------------------------------------------------------------------|
| <p>Levothyroxine (thyroid hormone)</p>                                                   | 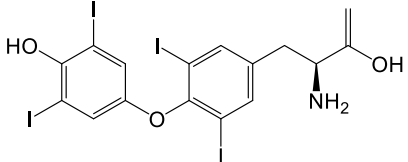 <p>The structure shows a central benzene ring with two iodine atoms at the 3 and 5 positions. This ring is linked via an ether oxygen to another benzene ring with iodine atoms at the 3 and 5 positions. A propyl chain is attached to the 4 position of the second ring, with an amino group (NH<sub>2</sub>) on the second carbon and a carboxylic acid group (COOH) on the third carbon.</p> |
| <p>Loperamide (Imodium, used to decrease the frequency of diarrhea)</p>                  |  <p>The structure features a central piperidine ring. One carbon of the piperidine ring is substituted with a hydroxyl group (OH) and a 4-chlorophenyl ring. Another carbon is substituted with a propyl chain that has a dimethylamino group (N(CH<sub>3</sub>)<sub>2</sub>) at the end. A third carbon is substituted with a diphenylmethyl group (CH<sub>2</sub>Ph<sub>2</sub>).</p>           |
| <p>Lypressin acetate (neuron hormone)</p>                                                |  <p>The structure is a complex cyclic peptide consisting of two rings. The amino acid sequence is Cys-Tyr-Phe-Gln-Asn-Cys-Pro-Lys-Gly-NH<sub>2</sub>. The structure shows various side chains including a hydroxyl group, a phenyl ring, and a long-chain amide group.</p>                                                                                                                         |
| <p>Manidipine 2HCl (calcium channel blocker used clinically as an anti-hypertensive)</p> |  <p>The structure shows a central dihydropyridine ring system. It has a nitro group (NO<sub>2</sub>) at the 4-position, a methyl group at the 2-position, and a side chain at the 3-position that includes a methoxy group, a carbonyl group, and a piperazine ring substituted with a diphenylmethyl group.</p>                                                                                |
| <p>Methacycline (tetracycline antibiotic)</p>                                            |  <p>The structure is a tetracycline derivative. It features a central tetracycline core with a methylamino group (NHCH<sub>3</sub>) at the 7-position and a dimethylamino group (N(CH<sub>3</sub>)<sub>2</sub>) at the 8-position. Various hydroxyl and carbonyl groups are also present.</p>                                                                                                    |
| <p>Nafamostat mesylate (serine protease inhibitor used for anti-coagulant)</p>           |  <p>The structure shows a naphthalene ring system. One ring has a primary amide group (NH<sub>2</sub>CH=NH) at the 1-position. The other ring is linked via an ester group to a side chain that includes a benzene ring and a guanidino group (N=C(NH<sub>2</sub>)<sub>2</sub>).</p>                                                                                                            |
| <p>Nuciferine (morphine analgesia)</p>                                                   |  <p>The structure is a morphine derivative. It features a pentacyclic ring system with a nitrogen atom in a bridgehead position. There are two methoxy groups (OCH<sub>3</sub>) on the aromatic ring and a methyl group on the nitrogen atom.</p>                                                                                                                                                |



|                                                                                 |                                                                                      |
|---------------------------------------------------------------------------------|--------------------------------------------------------------------------------------|
| <p>Proanthocyanidin (a flavan-3-ol in plants)</p>                               | 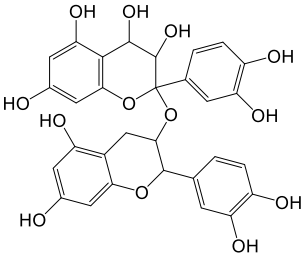    |
| <p>Plerixafor 8HCl<br/>(immunostimulant)</p>                                    |    |
| <p>Sisomicin sulfate<br/>(aminoglycoside antibiotic)</p>                        |    |
| <p>Streptomycin sulfate<br/>(aminoglycoside antibiotic)</p>                     |   |
| <p>Tanshinone I (anti-inflammatory)</p>                                         |   |
| <p>Tobramycin sulfate<br/>(aminoglycoside antibiotic)</p>                       |  |
| <p>Tosufloxacin p-toluenesulfonate hydrate<br/>(fluoroquinolone antibiotic)</p> |  |

**Figure S1. Plaque Reducing Activities of 6 FDA-approved drugs.** Reduction of virus plaques was observed in the presence of 1.25–20  $\mu\text{M}$  of (A) Loperamide, (B) Manidipine, (C) Maprotiline, (D) Levothyroxine, (E) Proanthocyanidin, and (F) Reserpine. Loperamide, Maprotiline, and Manidipine were post-treatment; Levothyroxine and Proanthocyanidin were entry-treatment; Reserpine was full-time treatment. Being tested at the same time, Loperamide, Maprotiline, and Manidipine shared the same DMSO control. Levothyroxine and Proanthocyanidin shared the same DMSO control.

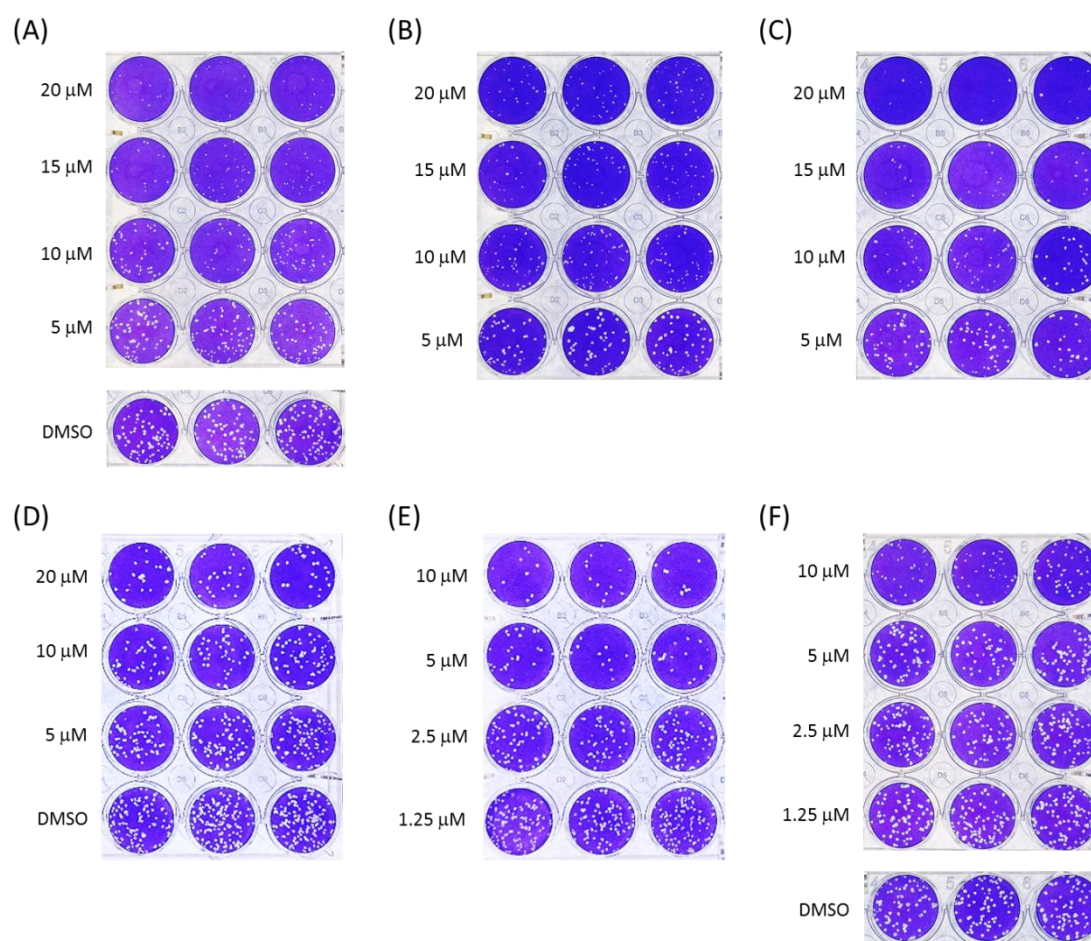

**Figure S1**
